# Supplementary material
Source: publisher figshare collection journal article supplement (https://rs.figshare.com/ndownloader/files/36567067)
Supplement: Supplementary file 1 [file 36567067]

Supplementary material for:

**RADseq data reveal a lack of admixture  
in a mouse lemur contact zone  
contrary to previous microsatellite results**

5

**Table of Contents**

|     |                                                   |    |
|-----|---------------------------------------------------|----|
| 1   | Supplementary Methods .....                       | 2  |
| 1.1 | Genotype filtering.....                           | 2  |
| 1.2 | Creating full-sequence FASTA files.....           | 4  |
| 1.3 | Ancestry assignment analyses with Structure ..... | 5  |
| 2   | Supplementary Tables .....                        | 6  |
| 3   | Supplementary Figures .....                       | 8  |
| 4   | References.....                                   | 27 |

# 1 Supplementary Methods

## 1.1 Sampling

Among the 33 allopatric additions to the Hapke et al. (2011) dataset, 13 were *griseorufus* and 20 *murinus s.l.* Ear clips from wild-caught and released mouse lemurs were collected between 2006 and 2017 (Table S1, Table S2).

The two “sympatric” sites Mangatsiaka and Tsimelaky are ~6.5 kilometers apart. Among the 49 samples from Mangatsiaka that we sequenced, Hapke et al. (2011) and Lüdemann (2018) classified 21 as *murinus* based on microsatellites as well as mtDNA, 13 as *griseorufus* based on microsatellites as well as mtDNA, 3 as *griseorufus* based on microsatellites but as *murinus* based on mtDNA (i.e. these individuals had a mitonuclear ancestry mismatch), and 14 as admixed based on the microsatellites (i.e. putative hybrids, of which 7 had a *griseorufus* mtDNA haplotype, and 7 had a *murinus* mtDNA haplotype). Among the 29 individuals from Tsimelaky, Hapke et al. (2011) classified 15 as pure *murinus*, 15 as pure *griseorufus*, and 1 as admixed based on microsatellites (this individual had a *griseorufus* mtDNA haplotype). Thus, in total, we sequenced 15 individuals for which Hapke et al. (2011) or Lüdemann (2018) had detected nuclear admixture, and an additional 3 with a mitonuclear ancestry mismatch.

Among “parapatric” sites, Hazofotsy is 14.5 kilometers from Mangatsiaka, whereas Ambatoabo is 14 kilometers from Tsimelaky (Fig. 1 - inset). In total, we sequenced 94 samples from the contact zone area (sympatric and parapatric sites) in the Andohahela area.

## 1.2 Sequencing, read processing and genotyping

We prepared Restriction-site Associated DNA (RAD) sequencing libraries using 50 ng of genomic DNA from each sample following the protocol of Ali et al. (2016). Briefly, samples were digested with SbfI (New England Biolabs), followed by ligation with custom biotinylated adapters containing 8 bp barcodes unique to each sample. We pooled 48 samples in a single library, with a technical replicate for four of these samples, and sheared DNA to an average fragment size of 400 bp using a Covaris M220. RAD fragments were enriched with a streptavidin bead pull-down and prepared as a sequencing library using a NEBNext Ultra DNA Library Prep Kit (New England Biolabs). Final libraries were sequenced using paired-end 150 bp sequencing on an Illumina HiSeq 4000 at Duke University's Center for Genomic and Computational Biology sequencing facility.

When using the Ali et al. (2016) RADseq protocol, half of the barcodes end up in the reverse (R2) reads. Therefore, raw reads in FASTQ files were first “flipped” using a custom Perl script, and

were next demultiplexed and deduplicated in `Stacks` v2.0b (Rochette et al. 2019) using the “`process_radtags`” and “`clone_filter`” commands, respectively. Reads were then quality  
40 filtered using `Trimmomatic` (Bolger et al. 2014) with the following parameters: Leading: 3, Trailing: 3, Slidingwindow: 4:15, Minlen: 60. Reads were aligned to the *M. murinus* reference genome (“`Mmurinus 3.0`”,  
[https://www.ncbi.nlm.nih.gov/genome/777?genome\\_assembly\\_id=308207](https://www.ncbi.nlm.nih.gov/genome/777?genome_assembly_id=308207), Larsen et al. 2017) with `BWA MEM` v0.7.15 (Li 2013). From the resulting BAM files, reads that were properly paired and had  
45 a minimum mapping quality of 30 were retained using “`samtools view`” (“`-f 0x2`” and “`-q 30`” arguments, respectively), and filtered BAM files were sorted using “`samtools sort`”, all from the `samtools` library (v1.6, Li et al. 2009).

We performed genotype calling with `GATK` v4.0.7.0 (DePristo et al. 2011), and we filtered SNPs and individuals largely according to the “FS6” filter of O’Leary et al. (2018) (see  
50 *Supplementary Materials* for details). Unless otherwise noted, downstream analyses used sets of SNPs that resulted from this filtering procedure for all analyses except the coalescent-based modeling. The filtering procedure, which includes several consecutive rounds of removing the individuals and SNPs with the highest amounts of missing data, was performed separately for the set of all 135 sequenced individuals (including the 3 outgroup individuals; the resulting VCF was  
55 used for phylogenetic inference, admixture statistics, and served as the basic for generating full-sequence loci for coalescent-based modeling) and for the set of 94 individuals from the contact zone area (the resulting VCF was used for clustering analyses).

For the set of individuals from the contact zone area, we additionally produced two datasets using more lenient filtering procedures, to be able to examine admixture using more individuals and  
60 SNPs: (1) a dataset produced by omitting the last round of removal of SNPs and individuals based on missing data; (2) a dataset produced using the FS6 filter without the individual-filtering steps that retained two additional putative hybrids and two individuals with mitonuclear discordance.

We computed the following quality control statistics for each sample and then compared these between samples that had previously been identified as *murinus*, as *griseorufus*, or as hybrid:  
65 number of filtered FASTQ reads, depth of coverage in BAM files, mean mapping quality, percentage of reads that were mapped, percentage of reads that were properly paired, depth of coverage, and the percentage of missing data in VCF files.

### 1.3 Genotype filtering

We used GATK's "HaplotypeCaller" tool to produce GVCF files for each sample. GVCF files were then merged to multi-sample, single-scaffold "*GenomicsDB Workspaces*" using GATK's "GenomicsDBImport" tool (this merging step is necessary because in GATK v4 since the joint genotyping tool no longer accepts multiple GVCF files), and these *Workspaces* were then used as input for GATK's "GenotypeGVCFs" tool, which we ran using the "--use-new-qual-calculator" option.

VCF files were filtered according to recommendations from O'Leary et al. (2018), following their "FS6" filtering steps (See Table 2 in O'Leary et al. 2018). First, we selected only SNPs (i.e., discarding structural variants) using GATK's `SelectVariants` tool with option "`-selectType SNP`". Next, we annotated the VCF file with the *Allele Balance* statistic using GATK's "VariantAnnotator" tool with option "`-A AlleleBalance`". The FS6 filtering procedure involved removing the following data in the following order:

1. Per-sample genotypes with a depth below 5 (using "`--minDP 5`" in `vcftools`) are set to "missing".
2. Sites with an across-sample genotype quality (*Qual*) lower than 20 (using "`--minQual 20`" in `vcftools`).
3. Sites with an across-sample mean depth lower than 15 (using "`--min-meanDP 15`" in `vcftools`).
4. Sites/samples with specified amounts of missing data. A progressive series of filtering steps for missing data was performed, alternating between filtering at the site level (wherein sites with more than the specified percentage of missing data are removed) and filtering at the sample level (wherein sites with more than the specified percentage of missing data are removed). Site-filtering was done using "`--max-missing <threshold>`" in `vcftools`, whereas sample-filtering first required the computation of per-sample statistics on missing data (using "`--missing-indv`" in `vcftools`), followed by the removal of samples exceeding the threshold using "`--remove <sample_ID>`" in `vcftools`. Specifically, these are the maximum missing data thresholds for the consecutive filtering steps (note that this procedure is the same as in O'Leary et al.'s FS6, but the following notation is slightly different):

a) site: 50%

- 100      b) sample: 90%
- c) site: 40%
- d) sample: 70%
- e) site: 30%
- f) sample: 50%
5. Sites with more than two alleles. Note that this step is not present in O'Leary's FS6 filter.
- 105      6. Sites not passing any of the following filters based on statistics in the "INFO" field of the VCF file.
- a) Allele balance ( $ABHet < 0.2$  or  $ABHet > 0.8$ )
- b) Mapping quality ratio of reference vs. alternative allele ( $MQRankSum < -12.5$ )
- c) Strandedness of reference vs. alternative allele ( $FS > 60.0$ )
- 110      d) Quality-by-depth ratio ( $QD < 2.0$ )
- e) Absolute mapping quality ( $MQ < 40.0$ )
- f) Read position of reference vs. alternative allele ( $ReadPosRankSum < -8$ )

115      These sites were set to "*FILTER*" status using GATK's "*VariantFiltration*" tool followed by removal using "*--remove-filtered-all*" in *vcftools*. The threshold values used here are based on GATK guidelines (<https://gatkforums.broadinstitute.org/gatk/discussion/2806/howto-apply-hard-filters-to-a-call-set>), except for item a, the allele balance filter, which is not present in the GATK recommendations. For this step, we largely followed the GATK guidelines because O'Leary et al. (2018) were not always explicit about thresholds and/or performed filtering with custom procedures rather than "*VariantFiltration*" parameters. Additional minor differences with O'Leary's et al. (2018) framework are that we also included filtering based on absolute mapping score (item e above) and read position (item f above), and that we removed non-properly paired reads during BAM-file processing steps rather than in the VCF.

120

125

7. Sites with a depth higher than the mean depth plus twice the standard deviation in depth. This maximum depth threshold was computed in a first step, and sites with excessive depth were next removed using “-max-meanDP <threshold>” in vcftools.

130 8. A final round of filtering sites and samples with excessive missing data (as in step 5, see above) were removed using:

a) sample: 25%

b) site: 5%

135 For analyses on subsets of the data, such as the 6-species and 4-species datasets used in the G-PhoCS analysis, we started by subsetting the *raw* VCF with the focal samples, and then applying the filters as listed above.

For the set of samples from the contact zone area, we additionally produced two datasets using more lenient filtering procedures, to be able to examine admixture using more samples and SNPs:

- 140 1. A dataset produced by omitting the last round of removal of SNPs and samples based on missing data (i.e., step 8 above). This is referred to in the supplementary figures and tables below as “*FS7*”.
- 145 2. A dataset produced using the FS6 filter without the sample-level filtering steps (in steps 4 and 8). Sample selection was instead done by taking all samples that passed the regular FS6 filter, and additionally retaining two additional putative hybrids and two samples with mitonuclear discordance with reasonable depth of coverage. This is referred to in the supplementary figures and tables below as “*rescue*”.

## 1.4 Creating full-sequence FASTA files

To produce full-sequence FASTA files from the VCF files (i.e., including invariant sites), we used the following procedure: First, we ran the GATK v3.8 tool “FastaAlternateReferenceMaker” for each sample, producing a single-sample whole-genome fasta file based on the reference genome but replacing sites that were called as non-reference alleles in the *unfiltered* VCF file. Then, the following classes of bases were masked: (1) non-reference bases that did not pass filtering (see RADseq genotyping and filtering section above); (2) sites that were classified as non-callable using GATK v3.8’s “CallableLoci” tool, using a minimum depth of 3.

Next, “loci” were extracted by (1) defining loci at an individual level as stretches of at least 25 consecutive called (non-N) bases or multiple such stretches separated by at most 10 consecutive Ns; (2) intersecting these stretches across samples, requiring at least 1 bp of overlap, and trimming from both ends any bases with fewer than 80% of focal samples represented; (3) filtering the resulting loci to include only loci that: (a) had sequences for at least 90% of focal samples, (b) were at least a 100 bp long, (c) contained at most 10% missing data, and (d) were at least 10 kbp from a neighboring locus in either direction.

Deleted: and

## 1.5 Ancestry assignment analyses with Structure

STRUCTURE performs a clustering of samples into a user defined number of clusters K, based on the genotype. The result are posterior probabilities for each sample belonging to each of the K clusters. For this analysis, no prior population information was provided, using the admixture ancestry model with independent allele frequencies and lambda set to 1. As suggested by Gilbert et al. (2012), 20 runs per K were performed, with 100 000 iterations of burn-in and 100 000 iterations after that, while K was set from 1 to 5. Selecting for the optimal number of K was done by following the Evanno et al. (2005) method of the ad hoc statistic  $\Delta K$ , and the Pritchard et al. (2000) method, both implemented in the web version of Structure Harvester version v0.6.94 (Earl and vonHoldt 2012). For every dataset,  $\Delta K$  clearly indicated  $K = 2$  as best K, whereas the Pritchard method suggests a  $K = 4$ .

## 1.6 $F_{ST}$

Weir and Cockerham weighted  $F_{ST}$  estimates for pairwise comparisons between population groupings was calculated from VCF files using *vcftools*.

## 1.7 Treemix

In Treemix, admixture events among populations are inferred based on a user-defined number of admixture events. We used a number of admixture events  $m$  ranging from 0 to 10, and 100 bootstraps. We performed likelihood-ratio tests to determine the most likely number of migration events, comparing each graph to one with one fewer migration event, and took the first non-significant comparison as the most likely number of migration events.

## 1.8 Demographic Modeling

Because it was not computationally feasible to run G-PhoCS and BPP for the entire dataset, we selected 3 individuals per population with high coverage and low amounts of missing data, while ensuring that mean coverage and missing data amounts were approximately equal across populations. The species tree recovered from phylogenetic analyses was fixed for parameter sampling.

Gene flow is modelled in G-PhoCS using one or more discrete unidirectional migration bands between a pair of extant or ancestral lineages that overlap in time. Since each migration band adds a parameter to the model, it is often not feasible to include all possible migration bands. Here, we modelled reciprocal migration bands between *gri*-C and *mur*-C and between ancestral *griseorufus* and *murinus* lineages, as we were interested in the occurrence gene flow between *griseorufus* and *murinus* in the contact zone and in more ancient gene flow between the two species. Additionally, we ran a model with no migration bands to assess how this affected divergence time and population size estimates. [We ran both models 4 times with a burn-in of 70,000 MCMC iterations, a total number of 5.4 million \(no migration\) and 2.9 million \(migration\) MCMC iterations, and the following priors as specified in the config file \(which has been uploaded to Dryad\) for G-PhoCS: “tau-theta-alpha 1.0”, “tau-theta-beta 500.0”, “mig-rate-alpha 0.002”, “mig-rate-beta 0.00001”, and introducing migration bands into the model after 25,000 MCMC iterations \(migration parameters only apply to the model with migration bands\).](#)

The multispecies-coalescent-with-introgression (MSCi) model in BPP estimates, for each introgression event, the introgression probability  $\phi$ , which represents the proportion of loci inherited from one of the two parents of an introgression node. We conducted 4 replicate runs all of which assessed support for 6 introgression events during the same periods for which gene flow was modelled in G-PhoCS: between the extant *mur*-C and *gri*-C populations, between the *murinus* lineage ancestral to *mur*-C and *mur*-E and the co-temporal ancestral *griseorufus* lineage, and between ancestral *murinus* and *griseorufus* lineages prior to intraspecific divergence in both species. [We ran the model 4 times with a burn-in of 16,000 MCMC iterations, a total number of](#)



1.4 million MCMC iterations, and the following priors as specified in the control (config) file (which has been uploaded to Dryad): “thetaprior = 3 0.01 e”, “tauprior = 3 0.006”, and “phiprior = 1 1”.

## 2 Supplementary Results

### 2.1 QC statistics

QC statistics were overall highly similar between *murinus*, *griseorufus*, and putative hybrid samples from the contact zone area (Fig. S1–S10, Table S3). Statistics related to read mapping were slightly lower for *griseorufus* than for *murinus*, which is expected given that the reference genome is *murinus*: the percentage of mapped reads (means of 93.4% and 93.9%, respectively; Fig. S4), the mean mapping quality for unfiltered BAM files (means of 44.6 and 45.8, respectively; Fig. S5). For these statistics, putative hybrids were intermediate, which would be expected both if they were true hybrids and if they consisted of a mixture of individuals from either species. The percentage of properly paired reads differed very little between *griseorufus* (99.76%) and *murinus* (99.85%), though these distributions barely overlapped and putative hybrids separated in two clusters (Fig. S6).

A lower percentage of *griseorufus* samples passed the standard filtering procedure (“FS6”, 60.5% vs 83.7% for *murinus*, Table S3) but for samples passing these filtering steps, mean depth and the percentage of missing SNPs were similar between the two species (mean depth: 39.8x for *griseorufus* and 38.2x for *murinus*; mean percentage of missing SNPs 2.25% for *griseorufus* and 2.49% for *murinus*; Fig. S9–S10, Table S4). While putative hybrids had a slightly lower depth (34.7x) and higher missingness (2.92%) in the final VCF (Fig. S9–S10, Table S4), the absolute values are no cause of concern for subsequent analyses.

### 2.2 Intraspecific differentiation is more pronounced within *murinus*

G–PhoCS estimated a divergence time of 20.3–37.3 ka ago (95% HPD) between the contact zone area population (*mur*-C) and eastern (*mur*-E) *murinus* populations, whereas the divergence time between western (*mur*-W) and the ancestral southeastern population (*mur*-C + *mur*-E) was inferred to be much older at 162–291 ka ago (Fig. 6A,C). The divergence time between western (*gri*-W) and contact zone area (*gri*-C) *griseorufus* was estimated to be 43.6–79.2 ka ago. Thus, in line with NeighborNet results, considerably more pronounced population structure was detected within *murinus*.

Striking differences in  $N_e$  between extant populations were inferred, especially in *murinus*, where those of the two southeastern populations (*mur*-E: 13–16 k, *mur*-C: 45–53k) much smaller than that of the western (*mur*-W: 194–205 k) population (Fig. 6A,D). Similarly, in *griseorufus*, the

western (*gri*-W: 125-140 k) population was also inferred to be much larger than the southeastern population (*gri*-C: 46-50 k).

Overall, divergence time and population size estimates were similar for G-PhoCS models that did and those that did not incorporate gene flow (*Fig. 6C,D*) and for BPP (with gene flow); above, we presented estimates from G-PhoCS models that did incorporate gene flow. The largest differences were found for the divergence time between *murinus* and *griseorufus*, which was estimated to be 605 (95% HPD: 432-782) ka ago by G-PhoCS without accounting for gene flow, 824 (601-1081) ka ago by G-PhoCS when accounting for gene flow, and 945 (679-1238) ka ago by BPP.

### 3 Supplementary Tables

**Table S1: Sample information: contact zone area**

“put\_hybrid” = putative hybrid, “sp” = species, “mgri” = *Microcebus griseorufus*, “mmur” = *Microcebus murinus*, “pop” = population designation.

| ID      | Sample_ID | Hapke_ID       | site        | pop   | poptype    | lat        | lon       | sp_radseq | sp_msat | sp_mtDNA | filter_pass | put_hybrid |
|---------|-----------|----------------|-------------|-------|------------|------------|-----------|-----------|---------|----------|-------------|------------|
| mgri068 | 886       | NA             | Mangatsiaka | gri-C | sympatric  | -24.963083 | 46.555761 | mgri      | mgri    | mmur     | fail        | 1          |
| mgri069 | 887       | NA             | Mangatsiaka | gri-C | sympatric  | -24.963147 | 46.557383 | mgri      | mgri    | mmur     | rescue      | 1          |
| mgri070 | 889       | NA             | Mangatsiaka | gri-C | sympatric  | -24.963244 | 46.557797 | mgri      | mgri    | mgri     | FS7         | 0          |
| mgri071 | 890       | NA             | Mangatsiaka | gri-C | sympatric  | -24.962222 | 46.557378 | mgri      | mgri    | mmur     | rescue      | 1          |
| mgri072 | 2019      | NA             | Mangatsiaka | gri-C | sympatric  | -24.962831 | 46.557511 | mgri      | mgri    | mgri     | FS7         | 0          |
| mgri073 | 2020      | NA             | Mangatsiaka | gri-C | sympatric  | -24.962650 | 46.557983 | mgri      | mgri    | mgri     | fail        | 0          |
| mgri074 | 2021      | NA             | Mangatsiaka | gri-C | sympatric  | -24.962219 | 46.557972 | mgri      | mgri    | mgri     | fail        | 0          |
| mgri075 | HZ03      | Hzf_Mg_Hamb032 | Hazofotsy   | gri-C | parapatric | -24.841575 | 46.528875 | mgri      | mgri    | mgri     | FS6         | 0          |
| mgri076 | HZ05      | Hzf_Mg_Hamb034 | Hazofotsy   | gri-C | parapatric | -24.828919 | 46.547633 | mgri      | mgri    | mgri     | FS6         | 0          |
| mgri077 | HZ06      | Hzf_Mg_Hamb035 | Hazofotsy   | gri-C | parapatric | -24.828011 | 46.549208 | mgri      | mgri    | mgri     | FS6         | 0          |
| mgri078 | HZ11      | Hzf_Mg_Hamb040 | Hazofotsy   | gri-C | parapatric | -24.841658 | 46.529031 | mgri      | mgri    | mgri     | FS6         | 0          |
| mgri079 | HZ12      | Hzf_Mg_Hamb041 | Hazofotsy   | gri-C | parapatric | -24.841658 | 46.529031 | mgri      | mgri    | mgri     | FS6         | 0          |
| mgri080 | HZ13      | Hzf_Mg_Hamb042 | Hazofotsy   | gri-C | parapatric | -24.842269 | 46.529461 | mgri      | mgri    | mgri     | FS6         | 0          |
| mgri081 | HZ15      | Hzf_Mg_Hamb104 | Hazofotsy   | gri-C | parapatric | -24.841350 | 46.528883 | mgri      | mgri    | mgri     | fail        | 0          |
| mgri082 | HZ16      | Hzf_Mg_Hamb105 | Hazofotsy   | gri-C | parapatric | -24.841350 | 46.528883 | mgri      | mgri    | mgri     | FS6         | 0          |
| mgri083 | MG05      | Mtk_Mg_Hamb059 | Mangatsiaka | gri-C | sympatric  | -24.964172 | 46.557636 | mgri      | mgri    | mgri     | fail        | 0          |
| mgri084 | MG06      | Mtk_Mg_Hamb060 | Mangatsiaka | gri-C | sympatric  | -24.966453 | 46.554600 | mgri      | mgri    | mgri     | FS6         | 0          |
| mgri085 | MG16      | Mtk_Mg_Hamb126 | Mangatsiaka | gri-C | sympatric  | -24.966244 | 46.554728 | mgri      | mgri    | mgri     | FS6         | 0          |
| mgri086 | MG20      | Mtk_Mg_Hamb130 | Mangatsiaka | gri-C | sympatric  | -24.962811 | 46.556350 | mgri      | mgri    | mgri     | FS6         | 0          |
| mgri087 | MG22      | Mtk_Mg_Hamb132 | Mangatsiaka | gri-C | sympatric  | -24.966244 | 46.554728 | mgri      | mgri    | mgri     | FS6         | 0          |
| mgri088 | MG25      | Mtk_Mg_Hamb135 | Mangatsiaka | gri-C | sympatric  | -24.964172 | 46.557636 | mgri      | mgri    | mgri     | FS6         | 0          |
| mgri089 | MG85      | NA             | Mangatsiaka | gri-C | sympatric  | -24.962850 | 46.558133 | mgri      | mgri    | mgri     | fail        | 0          |
| mgri090 | Micro13   | Tml_Mg_MAndo13 | Tsimelahy   | gri-C | sympatric  | -24.951069 | 46.617919 | mgri      | mgri    | mgri     | FS6         | 0          |
| mgri091 | Micro14   | Tml_Mg_MAndo14 | Tsimelahy   | gri-C | sympatric  | -24.956069 | 46.610750 | mgri      | mgri    | mgri     | fail        | 0          |
| mgri092 | Micro19   | Tml_Mg_MAndo19 | Tsimelahy   | gri-C | sympatric  | -24.955589 | 46.613069 | mgri      | mgri    | mgri     | fail        | 0          |
| mgri093 | Micro31   | Tml_Mg_MAndo31 | Tsimelahy   | gri-C | sympatric  | -24.955589 | 46.613069 | mgri      | mgri    | mgri     | FS6         | 0          |
| mgri094 | Micro44   | Tml_Mg_MAndo44 | Tsimelahy   | gri-C | sympatric  | -24.952181 | 46.616931 | mgri      | mgri    | mgri     | FS6         | 0          |
| mgri095 | Micro58   | Tml_Mg_MAndo58 | Tsimelahy   | gri-C | sympatric  | -24.956150 | 46.610481 | mgri      | mgri    | mgri     | FS6         | 0          |
| mgri096 | Micro60   | Tml_Mg_MAndo60 | Tsimelahy   | gri-C | sympatric  | -24.951100 | 46.617739 | mgri      | mgri    | mgri     | FS7         | 0          |
| mgri097 | Micro70   | Tml_Mg_MAndo70 | Tsimelahy   | gri-C | sympatric  | -24.955931 | 46.611169 | mgri      | mgri    | mgri     | FS6         | 0          |
| mgri098 | Micro81   | Mtk_Mg_MAndo81 | Mangatsiaka | gri-C | sympatric  | -24.968836 | 46.557314 | mgri      | mgri    | mgri     | FS6         | 0          |
| mgri099 | TM41      | Tml_Mg_Hamb078 | Tsimelahy   | gri-C | sympatric  | -24.956050 | 46.610808 | mgri      | mgri    | mgri     | FS6         | 0          |
| mgri100 | TM46      | Tml_Mg_Hamb082 | Tsimelahy   | gri-C | sympatric  | -24.955550 | 46.612750 | mgri      | mgri    | mgri     | FS6         | 0          |

| ID      | Sample_ID | Hapke_ID       | site        | pop   | poptype    | lat        | lon       | sp_radseq | sp_msat | sp_mtDNA | filter_pass | put_hybrid |
|---------|-----------|----------------|-------------|-------|------------|------------|-----------|-----------|---------|----------|-------------|------------|
| mgri101 | TM49      | Tml_Mg_Hamb085 | Tsimelahy   | gri-C | sympatric  | -24.955578 | 46.612522 | mgri      | mgri    | mgri     | FS7         | 0          |
| mgri102 | TM50      | Tml_Mg_Hamb086 | Tsimelahy   | gri-C | sympatric  | -24.955822 | 46.613642 | mgri      | mgri    | mgri     | FS7         | 0          |
| mgri103 | TM51      | Tml_Mg_Hamb087 | Tsimelahy   | gri-C | sympatric  | -24.956211 | 46.616492 | mgri      | mgri    | mgri     | FS6         | 0          |
| mgri104 | TM52      | Tml_Mg_Hamb088 | Tsimelahy   | gri-C | sympatric  | -24.956325 | 46.615497 | mgri      | mgri    | mgri     | FS6         | 0          |
| mhyb001 | 2006      | NA             | Mangatsiaka | gri-C | sympatric  | -24.963147 | 46.557383 | mgri      | hybrid  | mgri     | rescue      | 1          |
| mhyb002 | 2009      | NA             | Mangatsiaka | mur-C | sympatric  | -24.962558 | 46.555864 | mmur      | hybrid  | mmur     | rescue      | 1          |
| mhyb003 | 2026      | NA             | Mangatsiaka | gri-C | sympatric  | -24.963083 | 46.555761 | mgri      | hybrid  | mgri     | FS6         | 1          |
| mhyb004 | 2027      | NA             | Mangatsiaka | gri-C | sympatric  | -24.963339 | 46.557489 | mgri      | mgri    | mgri     | FS6         | 0          |
| mhyb005 | 2033      | NA             | Mangatsiaka | gri-C | sympatric  | -24.963339 | 46.557489 | mgri      | hybrid  | mgri     | fail        | 1          |
| mhyb006 | 2034      | NA             | Mangatsiaka | gri-C | sympatric  | -24.962981 | 46.557908 | mgri      | hybrid  | mgri     | FS6         | 1          |
| mhyb007 | MG03      | NA             | Mangatsiaka | mur-C | sympatric  | -24.962461 | 46.553428 | mmur      | hybrid  | mmur     | FS6         | 1          |
| mhyb008 | MG15      | Mtk_Mm_Hamb125 | Mangatsiaka | mur-C | sympatric  | -24.966886 | 46.554289 | mmur      | hybrid  | mmur     | FS6         | 1          |
| mhyb009 | MG18      | Mtk_Mm_Hamb128 | Mangatsiaka | mur-C | sympatric  | -24.960756 | 46.560169 | mmur      | hybrid  | mmur     | FS6         | 1          |
| mhyb010 | MG24      | Mtk_Mm_Hamb134 | Mangatsiaka | mur-C | sympatric  | -24.963300 | 46.555264 | mmur      | hybrid  | mmur     | FS6         | 1          |
| mhyb011 | MG26      | Mtk_Mg_Hamb136 | Mangatsiaka | gri-C | sympatric  | -24.962131 | 46.558203 | mgri      | hybrid  | mgri     | FS6         | 1          |
| mhyb012 | MG27      | Mtk_Mm_Hamb137 | Mangatsiaka | mur-C | sympatric  | -24.963703 | 46.554400 | mmur      | hybrid  | mmur     | FS6         | 1          |
| mhyb013 | MG34      | Mtk_Mm_Hamb144 | Mangatsiaka | mur-C | sympatric  | -24.962181 | 46.553358 | mmur      | hybrid  | mmur     | FS6         | 1          |
| mhyb014 | MG50      | Mtk_Mm_Hamb160 | Mangatsiaka | mur-C | sympatric  | -24.963556 | 46.553606 | mmur      | hybrid  | mmur     | FS6         | 1          |
| mhyb015 | MG64      | Mtk_Mg_Hamb167 | Mangatsiaka | gri-C | sympatric  | -24.962983 | 46.557056 | mgri      | hybrid  | mgri     | FS6         | 1          |
| mhyb016 | Micro33   | Tml_Mg_MAndo33 | Tsimelahy   | gri-C | sympatric  | -24.955361 | 46.613989 | mgri      | hybrid  | mgri     | FS6         | 1          |
| mmur037 | AB01      | Abt_Mm_Hamb044 | Ambatoabo   | mur-C | parapatric | -24.819172 | 46.669656 | mmur      | mmur    | mmur     | FS6         | 0          |
| mmur038 | AB03      | Abt_Mm_Hamb046 | Ambatoabo   | mur-C | parapatric | -24.819172 | 46.669656 | mmur      | mmur    | mmur     | FS6         | 0          |
| mmur039 | AB04      | Abt_Mm_Hamb047 | Ambatoabo   | mur-C | parapatric | -24.818292 | 46.671294 | mmur      | mmur    | mmur     | FS6         | 0          |
| mmur040 | AB06      | Abt_Mm_Hamb049 | Ambatoabo   | mur-C | parapatric | -24.818869 | 46.664431 | mmur      | mmur    | mmur     | FS6         | 0          |
| mmur041 | AB12      | Abt_Mm_Hamb095 | Ambatoabo   | mur-C | parapatric | -24.819028 | 46.670106 | mmur      | mmur    | mmur     | FS6         | 0          |
| mmur042 | AB15      | Abt_Mm_Hamb098 | Ambatoabo   | mur-C | parapatric | -24.818292 | 46.671294 | mmur      | mmur    | mmur     | FS6         | 0          |
| mmur043 | AB16      | Abt_Mm_Hamb099 | Ambatoabo   | mur-C | parapatric | -24.817528 | 46.672233 | mmur      | mmur    | mmur     | FS6         | 0          |
| mmur044 | AB18      | Abt_Mm_Hamb101 | Ambatoabo   | mur-C | parapatric | -24.817575 | 46.672714 | mmur      | mmur    | mmur     | FS6         | 0          |
| mmur045 | MG17      | Mtk_Mm_Hamb127 | Mangatsiaka | mur-C | sympatric  | -24.962792 | 46.558772 | mmur      | mmur    | mmur     | FS6         | 0          |
| mmur046 | MG19      | Mtk_Mm_Hamb129 | Mangatsiaka | mur-C | sympatric  | -24.963703 | 46.554400 | mmur      | mmur    | mmur     | FS6         | 0          |
| mmur047 | MG23      | Mtk_Mm_Hamb133 | Mangatsiaka | mur-C | sympatric  | -24.961067 | 46.559056 | mmur      | mmur    | mmur     | FS6         | 0          |
| mmur048 | MG28      | Mtk_Mm_Hamb138 | Mangatsiaka | mur-C | sympatric  | -24.962811 | 46.556350 | mmur      | mmur    | mmur     | FS6         | 0          |
| mmur049 | MG42      | Mtk_Mm_Hamb152 | Mangatsiaka | mur-C | sympatric  | -24.962181 | 46.553358 | mmur      | mmur    | mmur     | FS6         | 0          |
| mmur050 | MG49      | Mtk_Mm_Hamb159 | Mangatsiaka | mur-C | sympatric  | -24.964047 | 46.553792 | mmur      | mmur    | mmur     | FS6         | 0          |
| mmur051 | MG58      | Mtk_Mm_Hamb161 | Mangatsiaka | mur-C | sympatric  | -24.963556 | 46.553606 | mmur      | mmur    | mmur     | FS6         | 0          |
| mmur052 | MG65      | Mtk_Mm_Hamb168 | Mangatsiaka | mur-C | sympatric  | -24.961622 | 46.556336 | mmur      | mmur    | mmur     | FS6         | 0          |

| ID      | Sample_ID | Hapke_ID       | site        | pop   | poptype   | lat        | lon       | sp_radseq | sp_msat | sp_mtDNA | filter_pass | put_hybrid |
|---------|-----------|----------------|-------------|-------|-----------|------------|-----------|-----------|---------|----------|-------------|------------|
| mmur053 | MG66      | Mtk_Mm_Hamb169 | Mangatsiaka | mur-C | sympatric | -24.962247 | 46.556506 | mmur      | mmur    | mmur     | FS6         | 0          |
| mmur054 | MG67      | Mtk_Mm_Hamb170 | Mangatsiaka | mur-C | sympatric | -24.963133 | 46.558022 | mmur      | mmur    | mmur     | fail        | 0          |
| mmur055 | MG68      | Mtk_Mm_Hamb171 | Mangatsiaka | mur-C | sympatric | -24.962797 | 46.558875 | mmur      | mmur    | mmur     | FS6         | 0          |
| mmur056 | MG73      | Mtk_Mm_Hamb073 | Mangatsiaka | mur-C | sympatric | -24.962444 | 46.555161 | mmur      | mmur    | mmur     | FS6         | 0          |
| mmur057 | MG75      | Mtk_Mm_Hamb075 | Mangatsiaka | mur-C | sympatric | -24.962803 | 46.553764 | mmur      | mmur    | mmur     | FS6         | 0          |
| mmur058 | MG79      | NA             | Mangatsiaka | mur-C | sympatric | -24.964111 | 46.555672 | mmur      | mmur    | mmur     | FS6         | 0          |
| mmur059 | MG83      | NA             | Mangatsiaka | mur-C | sympatric | -24.963333 | 46.554697 | mmur      | mmur    | mmur     | FS7         | 0          |
| mmur060 | MG84      | NA             | Mangatsiaka | mur-C | sympatric | -24.963978 | 46.554981 | mmur      | mmur    | mmur     | FS7         | 0          |
| mmur061 | MG88      | NA             | Mangatsiaka | mur-C | sympatric | -24.962975 | 46.553869 | mmur      | mmur    | mmur     | FS6         | 0          |
| mmur062 | MG92      | NA             | Mangatsiaka | mur-C | sympatric | -24.962753 | 46.556922 | mmur      | mmur    | mmur     | fail        | 0          |
| mmur063 | Micro04   | Tml_Mm_MAndo04 | Tsimelahy   | mur-C | sympatric | -24.956250 | 46.617800 | mmur      | mmur    | mmur     | FS6         | 0          |
| mmur064 | Micro06   | Tml_Mm_MAndo06 | Tsimelahy   | mur-C | sympatric | -24.954511 | 46.620689 | mmur      | mmur    | mmur     | FS6         | 0          |
| mmur065 | Micro12   | Tml_Mm_MAndo12 | Tsimelahy   | mur-C | sympatric | -24.958350 | 46.616369 | mmur      | mmur    | mmur     | FS6         | 0          |
| mmur066 | Micro24   | Tml_Mm_MAndo24 | Tsimelahy   | mur-C | sympatric | -24.954161 | 46.619189 | mmur      | mmur    | mmur     | FS6         | 0          |
| mmur067 | Micro25   | Tml_Mm_MAndo25 | Tsimelahy   | mur-C | sympatric | -24.948131 | 46.621661 | mmur      | mmur    | mmur     | FS6         | 0          |
| mmur068 | Micro27   | Tml_Mm_MAndo27 | Tsimelahy   | mur-C | sympatric | -24.947961 | 46.621219 | mmur      | mmur    | mmur     | FS6         | 0          |
| mmur069 | Micro38   | Tml_Mm_MAndo38 | Tsimelahy   | mur-C | sympatric | -24.958350 | 46.616369 | mmur      | mmur    | mmur     | FS6         | 0          |
| mmur070 | Micro49   | Tml_Mm_MAndo49 | Tsimelahy   | mur-C | sympatric | -24.954250 | 46.619300 | mmur      | mmur    | mmur     | FS6         | 0          |
| mmur071 | Micro88   | Mtk_Mm_MAndo88 | Mangatsiaka | mur-C | sympatric | -24.966683 | 46.554583 | mmur      | mmur    | mmur     | FS6         | 0          |
| mmur072 | TM42      | Tml_Mm_Hamb079 | Tsimelahy   | mur-C | sympatric | -24.948039 | 46.621075 | mmur      | mmur    | mmur     | FS6         | 0          |
| mmur073 | TM43      | Tml_Mm_Hamb080 | Tsimelahy   | mur-C | sympatric | -24.957525 | 46.617106 | mmur      | mmur    | mmur     | FS6         | 0          |
| mmur074 | TM44      | Tml_Mm_Hamb081 | Tsimelahy   | mur-C | sympatric | -24.954903 | 46.619461 | mmur      | mmur    | mmur     | fail        | 0          |
| mmur075 | TM47      | Tml_Mm_Hamb083 | Tsimelahy   | mur-C | sympatric | -24.947964 | 46.621269 | mmur      | mmur    | mmur     | FS7         | 0          |
| mmur076 | TM48      | Tml_Mm_Hamb084 | Tsimelahy   | mur-C | sympatric | -24.948575 | 46.620556 | mmur      | mmur    | mmur     | FS6         | 0          |
| mmur077 | TM53      | Tml_Mm_Hamb089 | Tsimelahy   | mur-C | sympatric | -24.956372 | 46.617286 | mmur      | mmur    | mmur     | FS7         | 0          |

**Table S2: Sample information: allopatric populations and outgroups**  
All these samples passed the FS6 VCF filter.

265 “pop” = population designation.

| ID      | Sample_ID    | species            | site             | pop   |
|---------|--------------|--------------------|------------------|-------|
| mgan007 | 00-016A-8577 | <i>ganzhorni</i>   | Mandena          | mur-E |
| mgan008 | 00-016A-875E | <i>ganzhorni</i>   | Mandena          | mur-E |
| mgan010 | 00-016A-8A1D | <i>ganzhorni</i>   | Mandena          | mur-E |
| mgan011 | 00-016A-8EBC | <i>ganzhorni</i>   | Mandena          | mur-E |
| mgan014 | 00072854DC   | <i>ganzhorni</i>   | Mandena          | mur-E |
| mgan016 | 0007289B19   | <i>ganzhorni</i>   | Mandena          | mur-E |
| mgan017 | 00074C3B6F   | <i>ganzhorni</i>   | Mandena          | mur-E |
| mgan018 | 00074C3F7D   | <i>ganzhorni</i>   | Mandena          | mur-E |
| mgan019 | 00074C439B   | <i>ganzhorni</i>   | Mandena          | mur-E |
| mgan021 | 00074C54EC   | <i>ganzhorni</i>   | Mandena          | mur-E |
| mgan022 | 00074CHC59   | <i>ganzhorni</i>   | Mandena          | mur-E |
| mgri005 | JMR008       | <i>griseorufus</i> | Antabore         | gri-W |
| mgri006 | JMR009       | <i>griseorufus</i> | Antabore         | gri-W |
| mgri007 | JMR010       | <i>griseorufus</i> | Antabore         | gri-W |
| mgri008 | JMR011       | <i>griseorufus</i> | Antabore         | gri-W |
| mgri037 | JMR007       | <i>griseorufus</i> | Tongaenoro       | gri-W |
| mgri040 | 000611B575   | <i>griseorufus</i> | Tsimanampetsotsa | gri-W |
| mgri041 | 000611C0E8   | <i>griseorufus</i> | Tsimanampetsotsa | gri-W |
| mgri043 | 00063932CD   | <i>griseorufus</i> | Tsimanampetsotsa | gri-W |
| mgri044 | 00063935DE   | <i>griseorufus</i> | Tsimanampetsotsa | gri-W |
| mgri045 | 00063983C7   | <i>griseorufus</i> | Tsimanampetsotsa | gri-W |
| mgri046 | 00063999A9   | <i>griseorufus</i> | Tsimanampetsotsa | gri-W |
| mgri047 | 000639B1E7   | <i>griseorufus</i> | Tsimanampetsotsa | gri-W |
| mgri050 | JMR025       | <i>griseorufus</i> | Vombositse       | gri-W |
| mgri051 | JMR026       | <i>griseorufus</i> | Vombositse       | gri-W |
| mmur001 | RMR44        | <i>murinus</i>     | Andranomena      | mur-W |
| mmur002 | RMR45        | <i>murinus</i>     | Andranomena      | mur-W |
| mmur004 | RMR47        | <i>murinus</i>     | Andranomena      | mur-W |
| mmur006 | RMR49        | <i>murinus</i>     | Andranomena      | mur-W |
| mmur009 | Joerg33      | <i>murinus</i>     | Kirindy          | mur-W |
| mmur012 | RMR27        | <i>murinus</i>     | Manamby          | mur-W |
| mmur013 | RMR28        | <i>murinus</i>     | Manamby          | mur-W |
| mmur014 | RMR29        | <i>murinus</i>     | Manamby          | mur-W |
| mruf003 | RMR147       | <i>rufus</i>       | Andrambovato     | NA    |
| mruf007 | E250M100     | <i>rufus</i>       | Ranomafana       | NA    |
| mruf008 | E250M91      | <i>rufus</i>       | Ranomafana       | NA    |

**Table S3: QC statistics for FASTQ, BAM, and VCF files by *microsatellite* assignment group.**

| <b>statistic</b>                           | <b><i>griseorufus</i></b> | <b>hybrid</b> | <b><i>murinus</i></b> |
|--------------------------------------------|---------------------------|---------------|-----------------------|
| FASTQ: read length - mean                  | 135.5                     | 135.6         | 135.6                 |
| FASTQ: read length - median                | 135.6                     | 135.6         | 135.6                 |
| FASTQ: read quality - mean                 | 38.24                     | 38.24         | 38.24                 |
| FASTQ: read quality - median               | 38.25                     | 38.25         | 38.24                 |
| FASTQ: raw reads - mean                    | 8,021,390                 | 6,483,790     | 6,459,171             |
| FASTQ: raw reads - median                  | 7,255,766                 | 5,966,376     | 6,026,840             |
| FASTQ: dedupped reads - mean               | 4,133,115                 | 3,325,910     | 3,279,254             |
| FASTQ: dedupped reads - median             | 3,668,470                 | 3,044,472     | 3,077,260             |
| FASTQ: trimmed reads - mean                | 3,191,330                 | 2,580,940     | 2,545,889             |
| FASTQ: trimmed reads - median              | 2,902,724                 | 2,377,917     | 2,379,176             |
| BAM: mapped reads - mean                   | 2,978,376                 | 2,410,410     | 2,385,964             |
| BAM: mapped reads - median                 | 2,689,533                 | 2,230,030     | 2,242,135             |
| BAM: mapping % - mean                      | 93.4 %                    | 93.53 %       | 93.87 %               |
| BAM: mapping % - median                    | 93.38 %                   | 93.43 %       | 93.79 %               |
| BAM: properly paired % - mean              | 99.76 %                   | 99.82 %       | 99.85 %               |
| BAM: properly paired % - median            | 99.76 %                   | 99.84 %       | 99.85 %               |
| BAM: mapping quality - filtered - mean     | 59.22                     | 59.2          | 59.21                 |
| BAM: mapping quality - filtered - median   | 59.22                     | 59.18         | 59.2                  |
| BAM: mapping quality - unfiltered - mean   | 44.59                     | 45.22         | 45.77                 |
| BAM: mapping quality - unfiltered - median | 44.61                     | 45.19         | 45.77                 |
| BAM: depth of coverage - mean              | 25.85                     | 23.38         | 24.35                 |
| BAM: depth of coverage - median            | 24.9                      | 22.41         | 23.61                 |
| VCF (FS6): depth of coverage - mean        | 39.77                     | 34.74         | 38.2                  |
| VCF (FS6): depth of coverage - median      | 38.56                     | 31.96         | 35.59                 |
| VCF (FS6): % missing SNPs - mean           | 2.247 %                   | 2.917 %       | 2.487 %               |
| VCF (FS6): % missing SNPs - median         | 1.574 %                   | 2.549 %       | 1.894 %               |



275    **Table S4: Filter-passing status by microsatellite assignment group.**

| <b>microsatellite<br/>assignment</b> | <b>standard<br/>("FS6")</b> | <b>last filtering<br/>step omitted<br/>("FS7")</b> | <b>FS6 +<br/>"rescue"</b> | <b>failed</b> | <b>sum</b> |
|--------------------------------------|-----------------------------|----------------------------------------------------|---------------------------|---------------|------------|
| <i>griseorufus</i>                   | 23                          | 5 (28 total)                                       | 2 (25 total)              | 8             | 38         |
| hybrid                               | 12                          | 0 (12 total)                                       | 4 (18 total)              | 1             | 15         |
| <i>murinus</i>                       | 36                          | 4 (40 total)                                       | 0 (36 total)              | 3             | 43         |
| <b>sum</b>                           | 71                          | 9                                                  | 4                         | 12            | 96         |

280 **Table S5: F<sub>ST</sub>**

**A:** For contact zone dataset (FS6 filter).  
“*sym*”=*sympatric*, “*para*”=*parapatric*

| pop 1                           | pop 2                           | F <sub>ST</sub> |
|---------------------------------|---------------------------------|-----------------|
| <i>griseorufus</i> – sym (n=21) | <i>murinus</i> – sym (n=33)     | 0.398           |
| <i>griseorufus</i> – para (n=7) | <i>murinus</i> – para (n=8)     | 0.419           |
| <i>gri-C</i> (sym+ para) (n=28) | <i>mur-C</i> (sym+ para) (n=41) | 0.399           |

285

**B:** For dataset with contact zone and allopatric populations (FS6 filter)

|                     | <i>gri-W</i> | <i>mur-C</i> | <i>mur-E</i> | <i>mur-W</i> |
|---------------------|--------------|--------------|--------------|--------------|
| <i>gri-C</i> (n=19) | 0.060        | 0.461        | 0.504        | 0.436        |
| <i>gri-W</i> (n=14) |              | 0.437        | 0.479        | 0.403        |
| <i>mur-C</i> (n=24) |              |              | 0.108        | 0.167        |
| <i>mur-E</i> (n=11) |              |              |              | 0.243        |
| <i>mur-W</i> (n=8)  |              |              |              |              |

4    **Supplementary Figures**

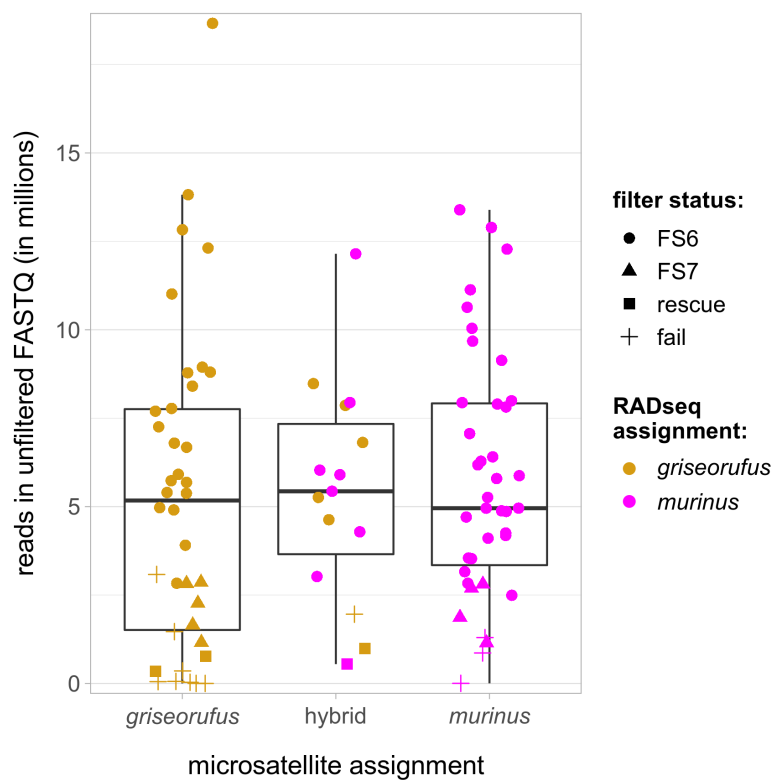

**Fig. S1: Number of reads in unfiltered FASTQ files.**  
Comparison across microsatellite species assignments (x-axis), RADseq species assignments (color of jittered points), and filter status (shape of jittered points).

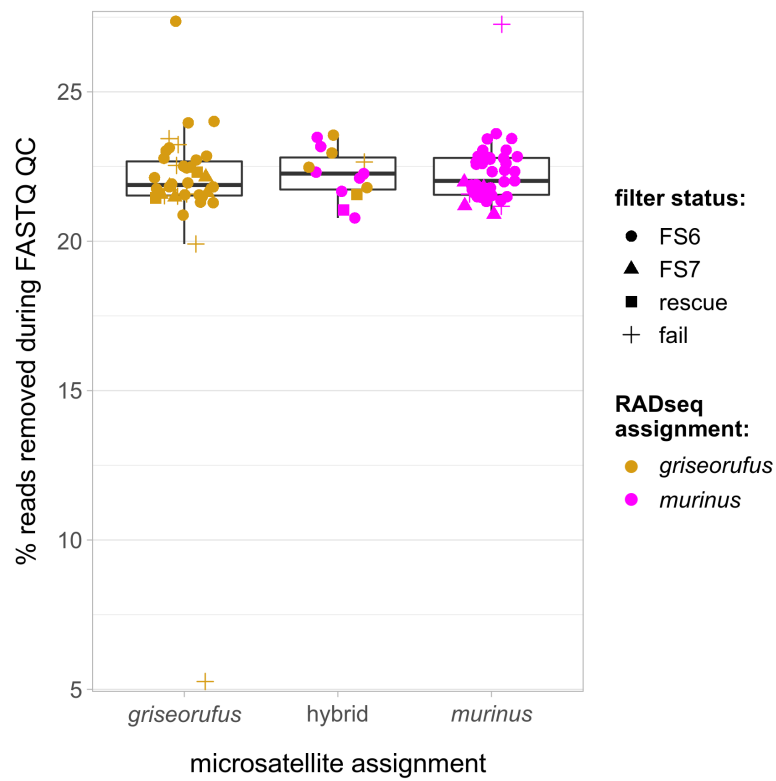

295 **Fig. S2: Percentage of reads removed by FASTQ filtering.**  
Comparison across microsatellite species assignments (x-axis), RADseq species assignments (color of jittered points), and filter status (shape of jittered points).

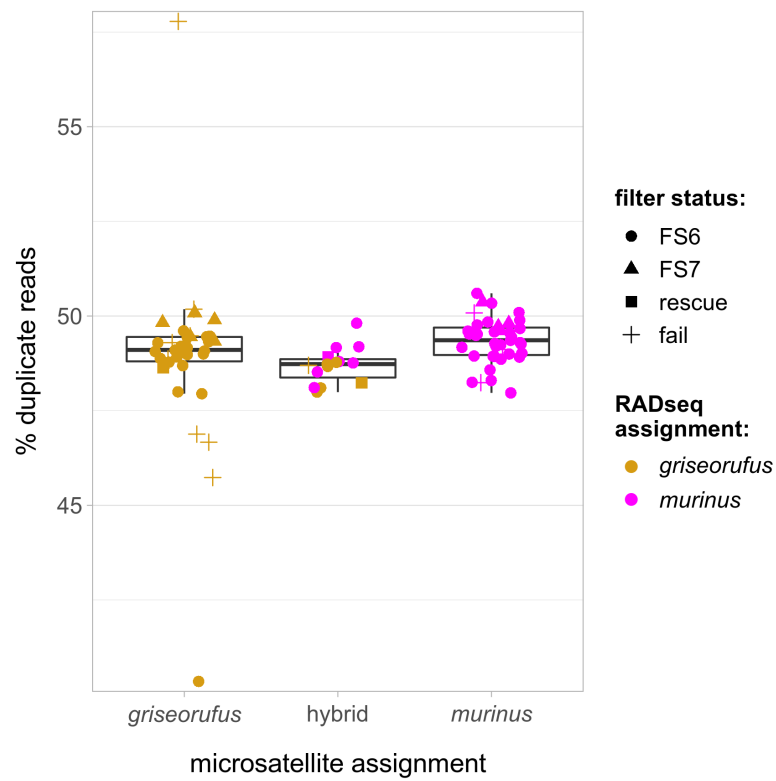

**Fig. S3: Percentage of duplicate reads.**

Comparison across microsatellite species assignments (x-axis), RADseq species assignments (color of jittered points), and filter status (shape of jittered points). Duplicate reads were removed prior to mapping.

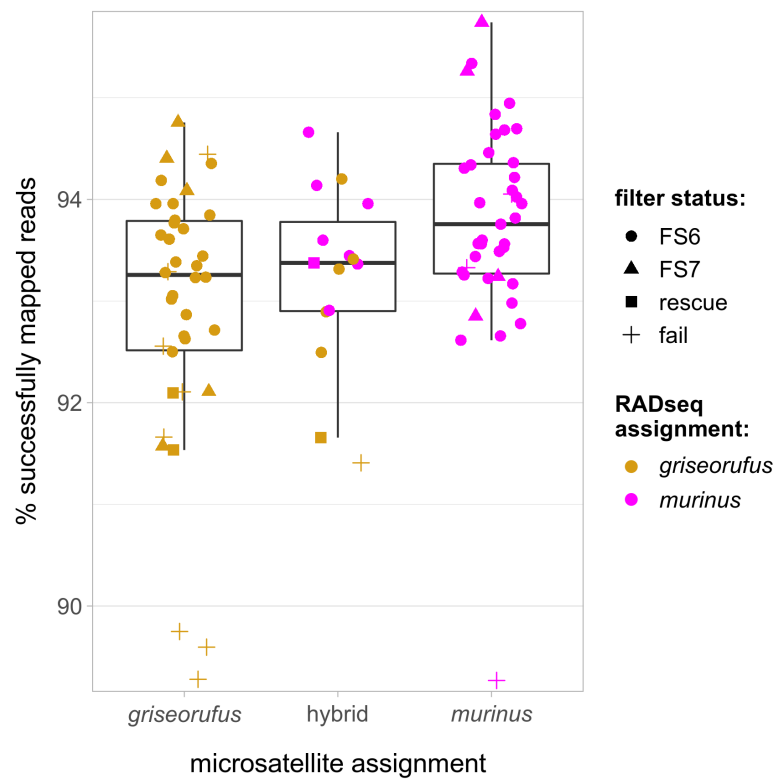

**Fig. S4: Percentage of successfully mapped reads.**

Comparison across microsatellite species assignments (x-axis), RADseq species assignments (color of jittered points), and filter status (shape of jittered points). Duplicate reads were removed prior to mapping.

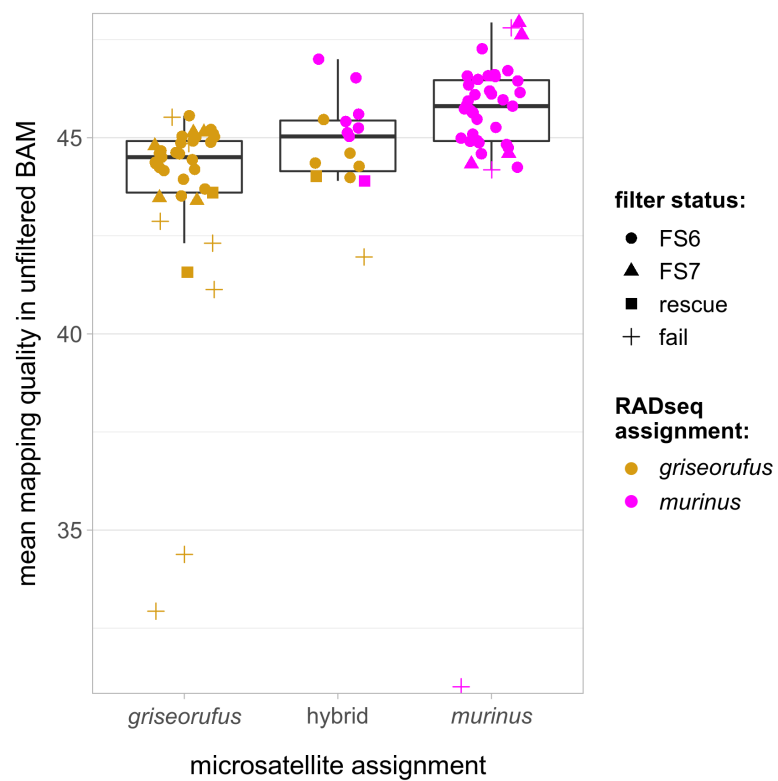

305 **Fig. S5: Mean mapping quality in unfiltered BAM files.**  
 Comparison across microsatellite species assignments (x-axis), RADseq species assignments (color of jittered points), and filter status (shape of jittered points).

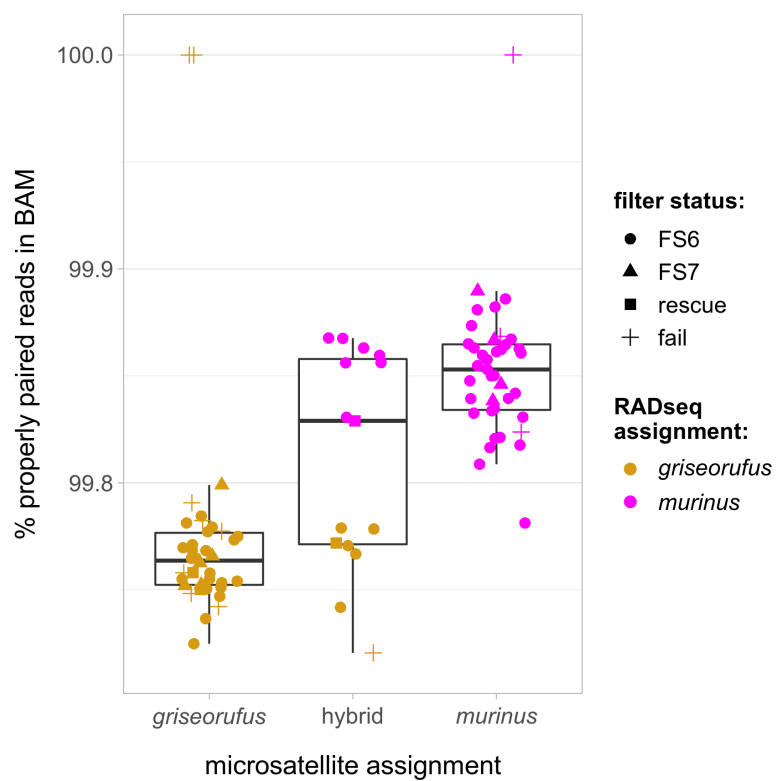

**Fig. S6: Percentage of properly paired read pairs in filtered BAM files.**

Comparison across microsatellite species assignments (x-axis), RADseq species assignments (color of jittered points), and filter status (shape of jittered points).



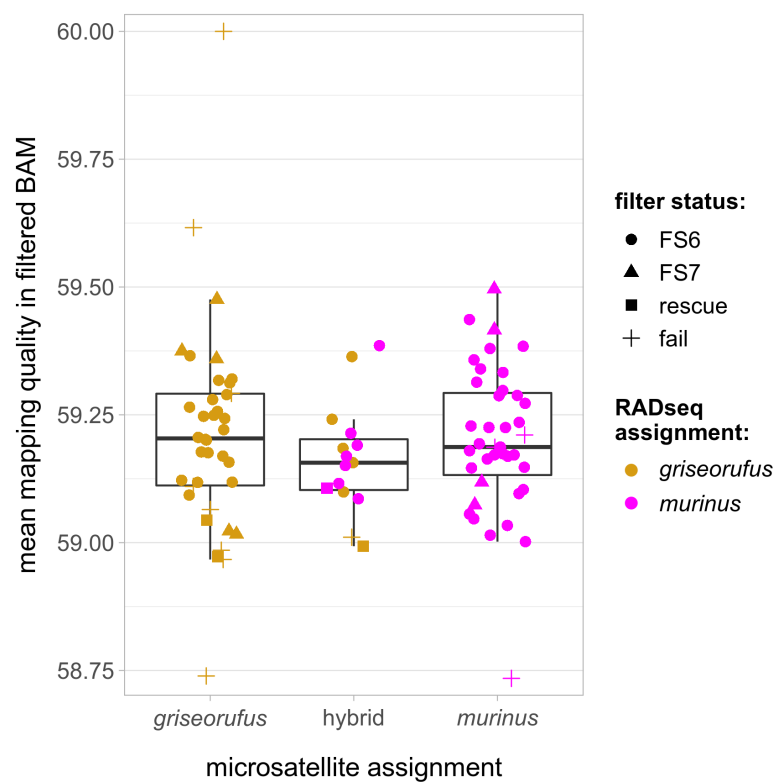

**Fig. S7: Mean mapping quality in filtered BAM files.**

Comparison across microsatellite species assignments (x-axis), RADseq species assignments (color of jittered points), and filter status (shape of jittered points).

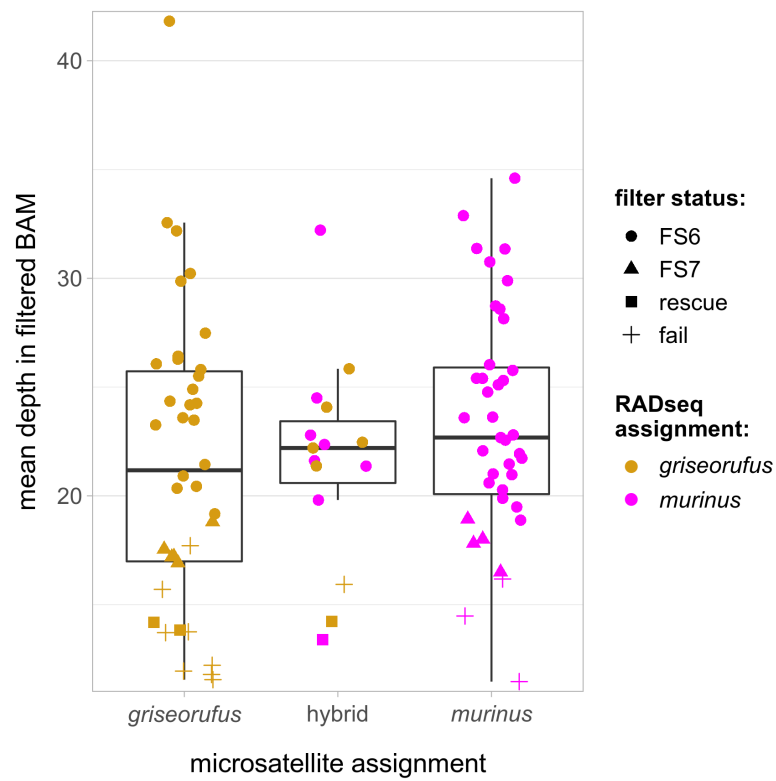

**Fig. S8: Mean depth of coverage in filtered BAM files.**  
Comparison across microsatellite species assignments (x-axis), RADseq species assignments (color of jittered points), and filter status (shape of jittered points).

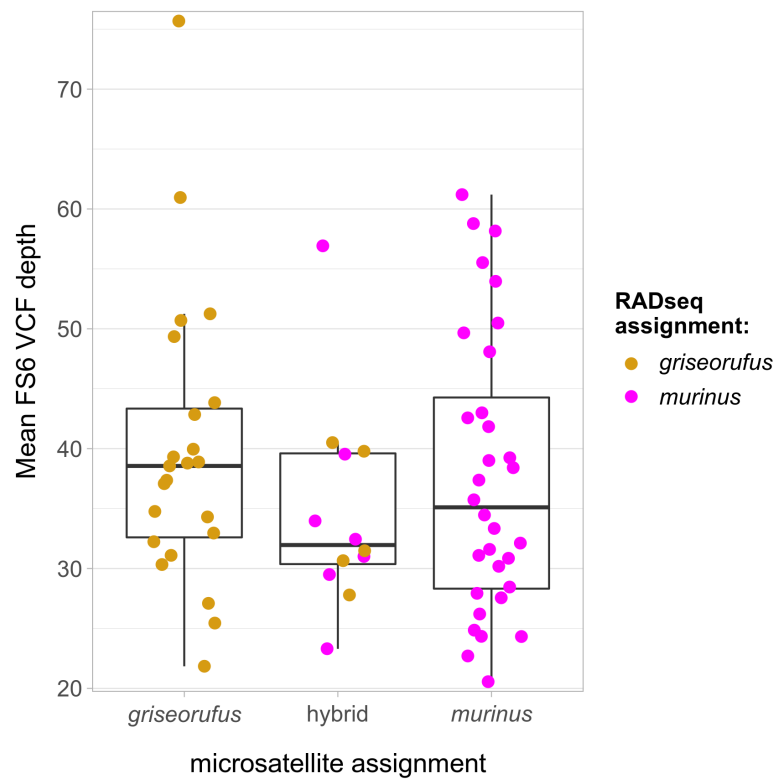

320 **Fig. S9: Mean depth of coverage in the “FS6” VCF file.** Comparison across microsatellite species assignments (x-axis), RADseq species assignments (color of jittered points), and filter status (shape of jittered points). This VCF file was used for the main analyses of ancestry in the contact zone are; see Methods for details on the filtering procedure.

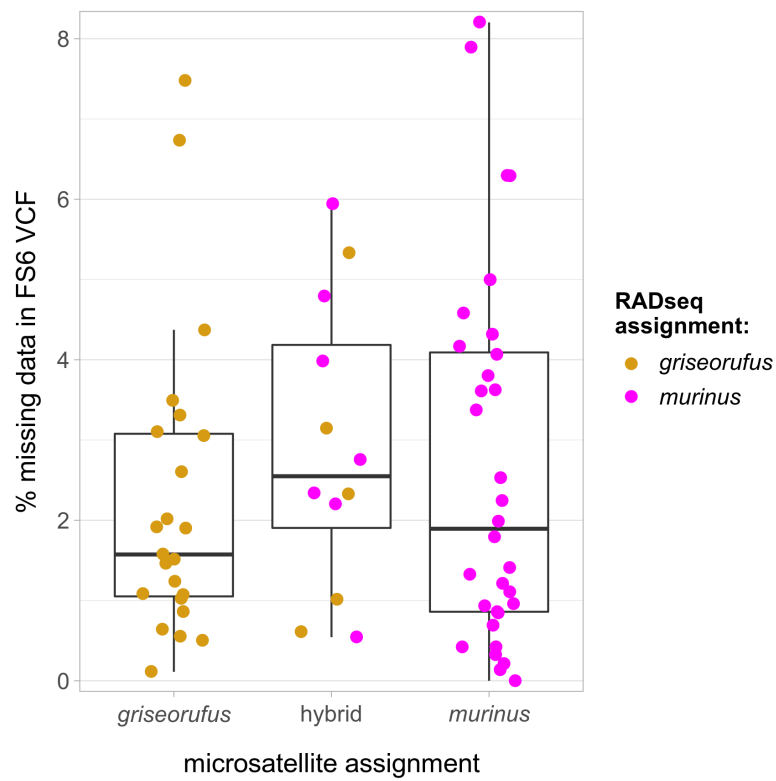

**Fig. S10: Percentage of missing data in the “FS6” VCF file.** Comparison across microsatellite species assignments (x-axis), RADseq species assignments (color of jittered points), and filter status (shape of jittered points). This VCF file was used for the main analyses of ancestry in the contact zone are; see Methods for details on the filtering procedure.

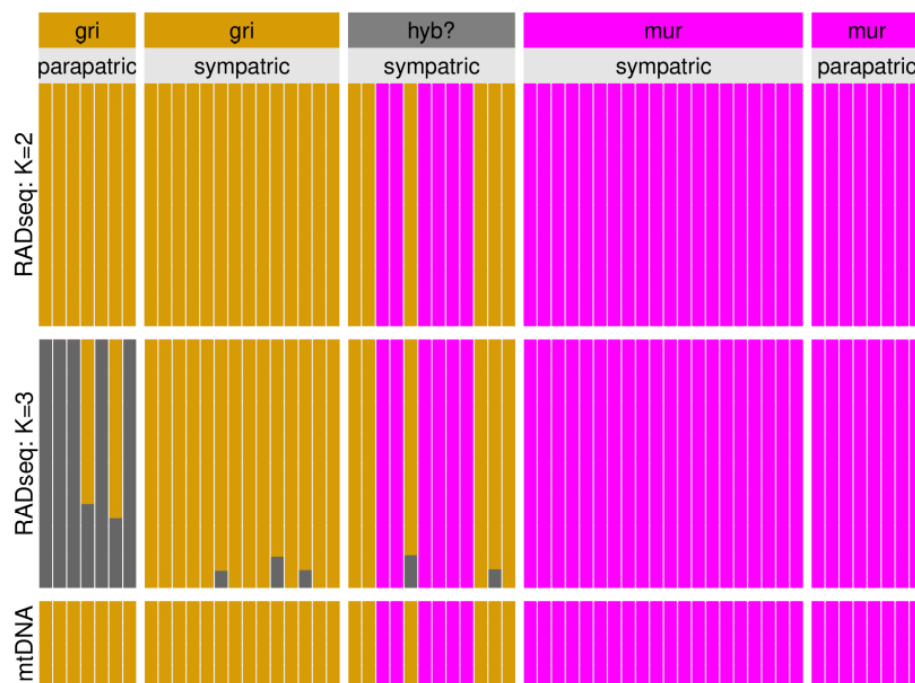

**Fig. S11: ADMIXTURE results including for K=3.**

The third cluster relates to differentiation in *griseorufus*, between parapatric (Hazofotsy) and sympatric (Mangatsiaka, Tsimelahy) sites.

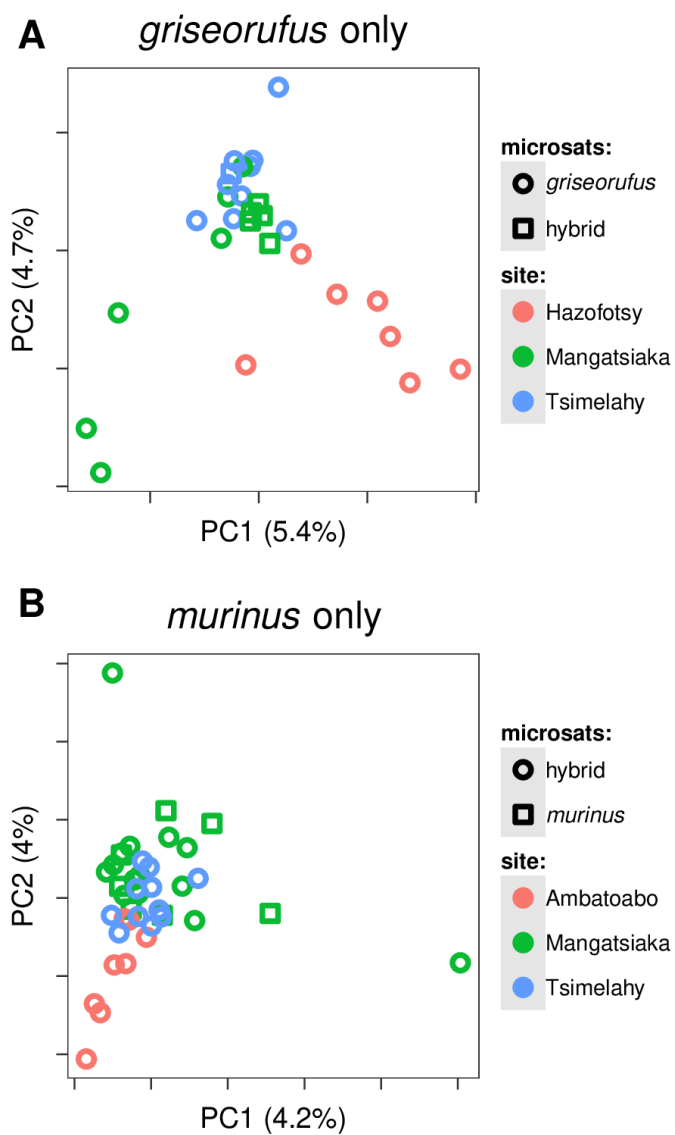

335

**Fig. S12: Within-species PCAs**

The "microsats" designation indicates how Hapke et al. (2011) classified the sample using microsatellites.

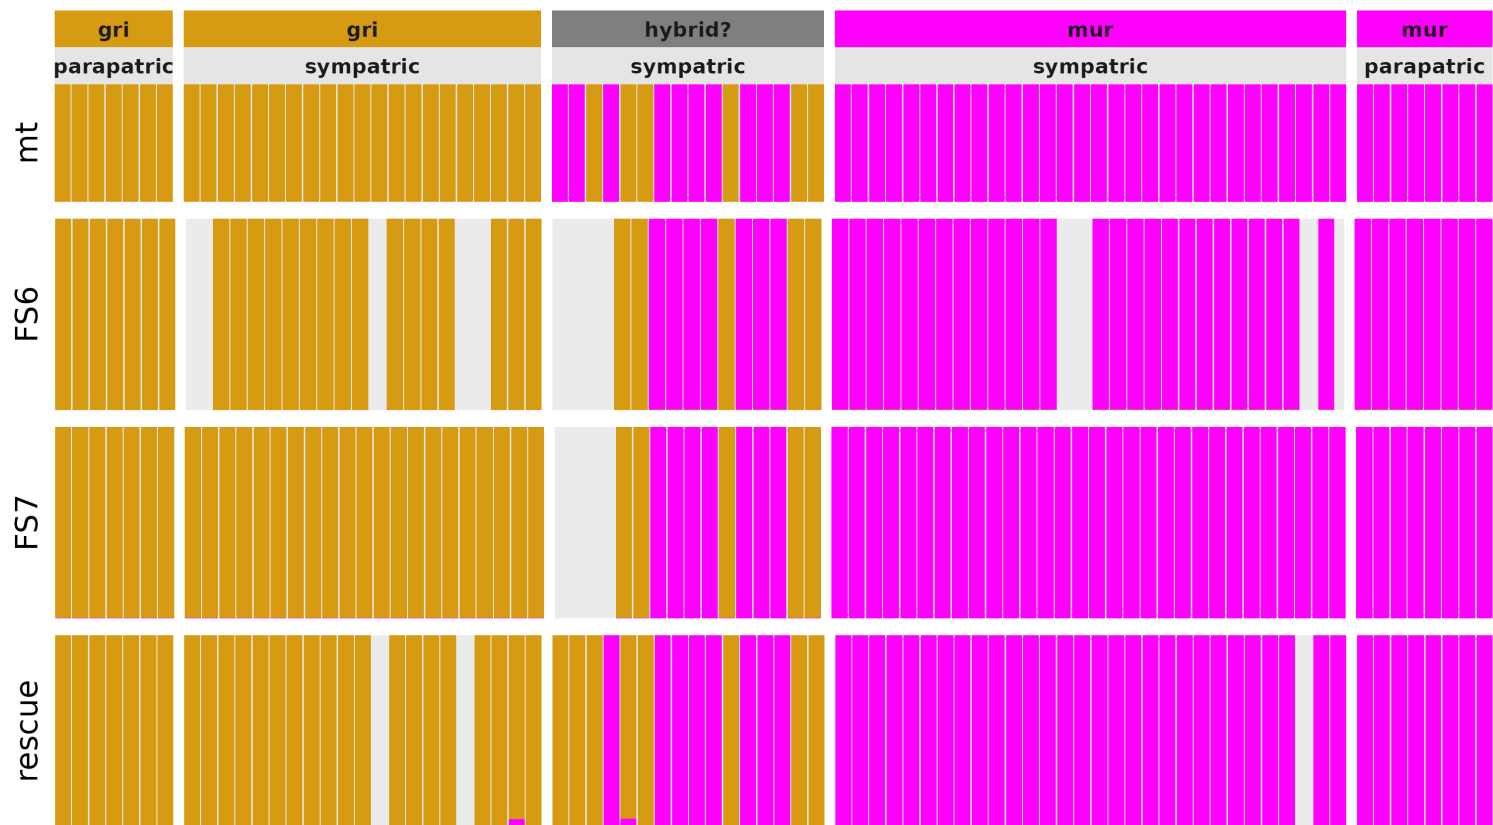

340

**Fig. S13: ADMIXTURE results for different filtering options**

Gray areas indicate that the samples in question were not present in the focal VCF file. Two samples (mhyb001 and mhyb002) only present in the “rescue” dataset show *griseorufus* nuclear DNA, but a *murinus* mitochondrial haplotype, in line with results from Lüdemann (2018). Two other samples (mhyb003 and mgri104) show <5% *murinus* ancestry in the “rescue” dataset, but these samples did not show any *murinus* ancestry in the FS6 and FS7 datasets, which contain many more SNPs and are therefore more reliable.

345

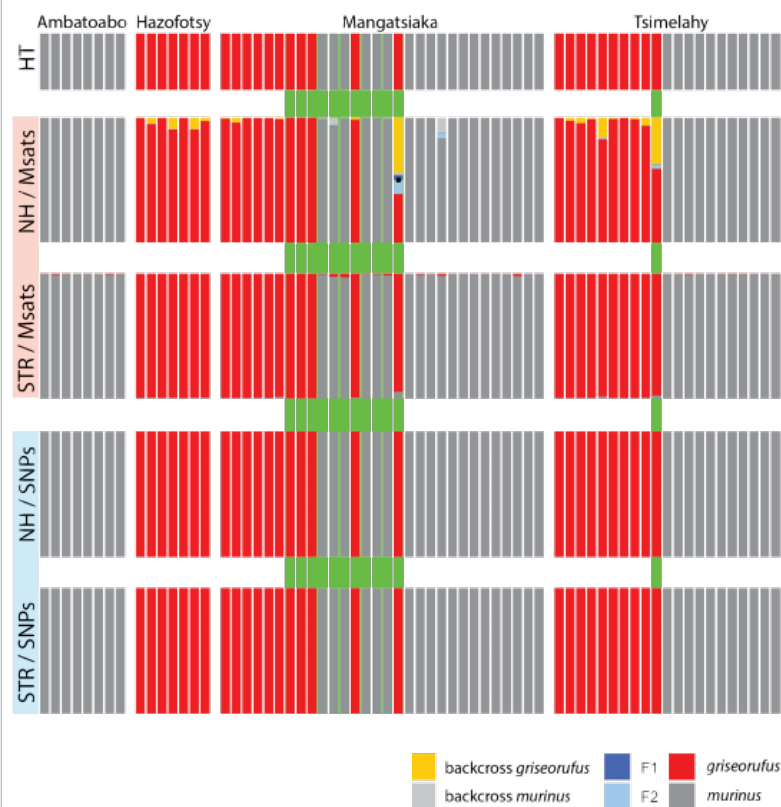

**Fig. S14: Re-analysis of microsatellite data for individuals with RADseq data.**

Top row: mitochondrial haplotype (HT).

Next two rows: microsatellites (Msats) analysed with NewHybrids (NH) and Structure (STR).

350 Bottom two rows: RADseq SNPs (SNPs) analysed with NewHybrids (NH) and Structure (STR).

While no hybrids are detected using RADseq data, NewHybrids identifies a single hybrid (black dot) using the microsatellite data, with several further *griseorufus* individuals showing non-significant signs of admixed ancestry (yellow ancestry).



355

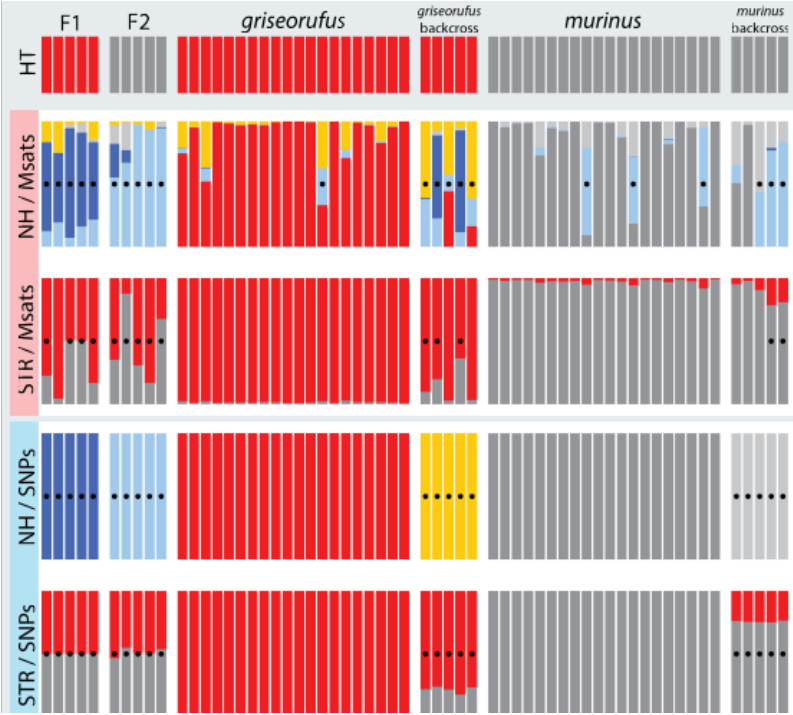

360

**Fig. S15: Assignment of simulated individuals using microsatellites and SNPs with Structure and Newhybrids.**  
A black dot indicates that a given sample was classified as a hybrid.  
HT: mitochondrial haplotype, NH: NewHybrids, STR: Structure, SNPs: RADseq SNP, Msats: microsatellites.

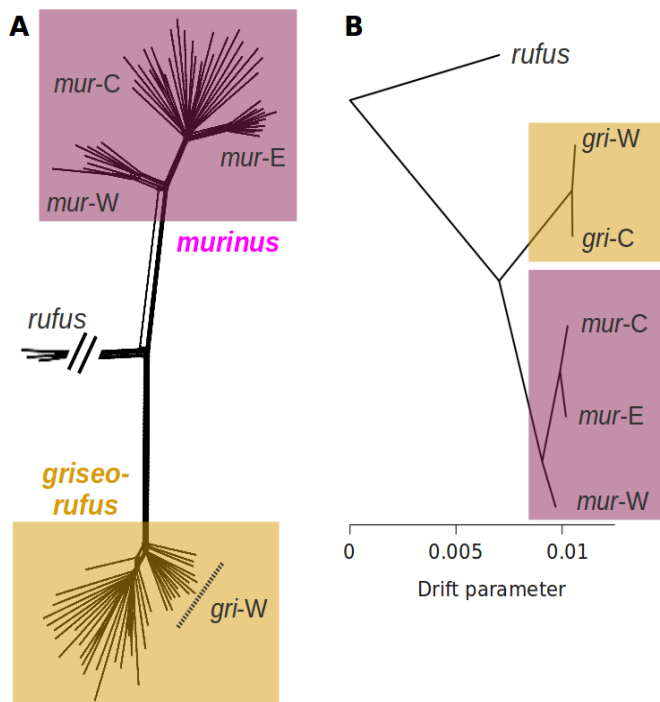

**Fig. S15: Phylogenetic relationships.**

**A)** A SplitsTree NeighborNet phylogenetic network. Each tip represents an individual, and the width of any edge boxes depicts phylogenetic conflict, which can be due to incomplete lineage sorting or admixture. Very little conflict is observed along the edges between *griseorufus* and *murinus*. *Murinus* is separated into three clades which correspond to western (*mur-W*), contact zone area (*mur-C*), and eastern (*mur-E*) populations. The separation of *griseorufus* into clades corresponding to western (*gri-W*) and contact zone area (*gri-C*) populations is not as well-defined.

**B)** Treemix results with no migration edges. Treemix supports the relationships suggested by the phylogenetic network, with western *murinus* (*mur-W*) being the most divergent among the three *murinus* populations.

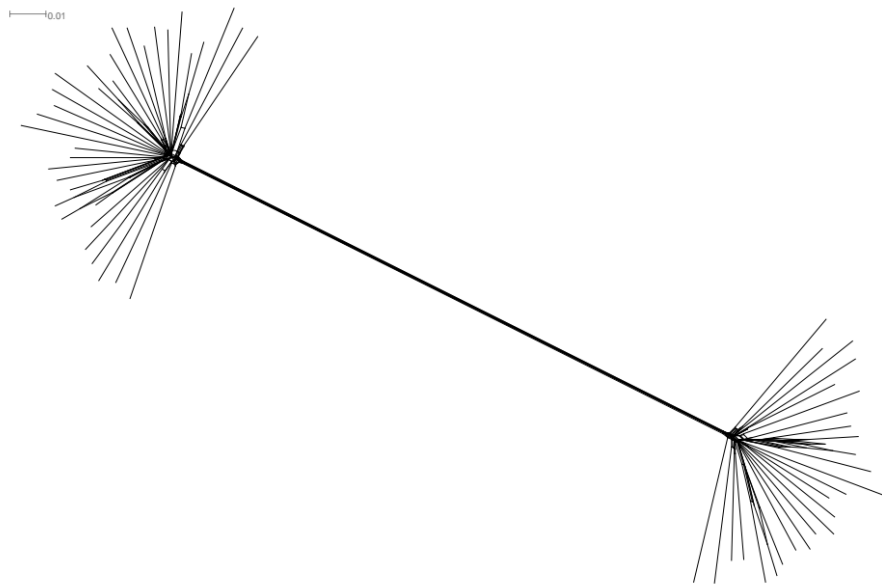

**Fig. S16: A SplitsTree NeighborNet phylogenetic network using only contact zone individuals.**

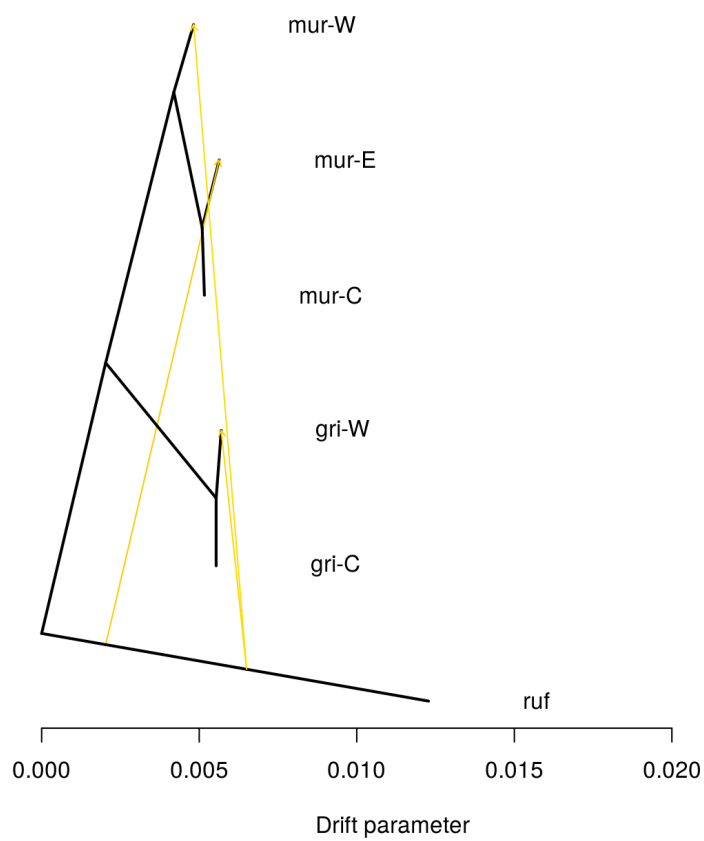

**Fig. S17: Significant migration edges using Treemix (with *M. rufus*).**  
All three migration edges are minor and involve *M. rufus*.

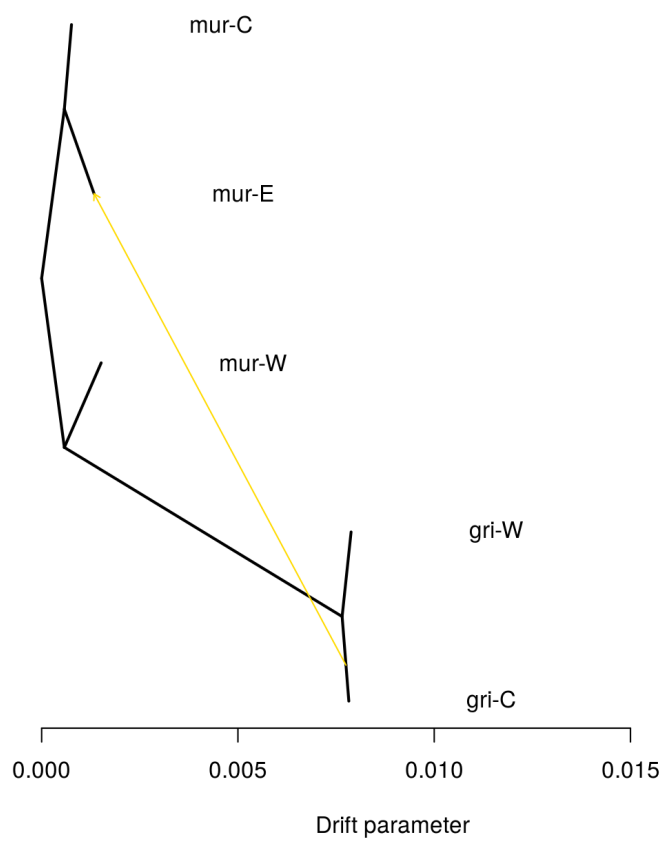

**Fig. S18: Significant migration edges using Treemix (without *M. rufus*).**

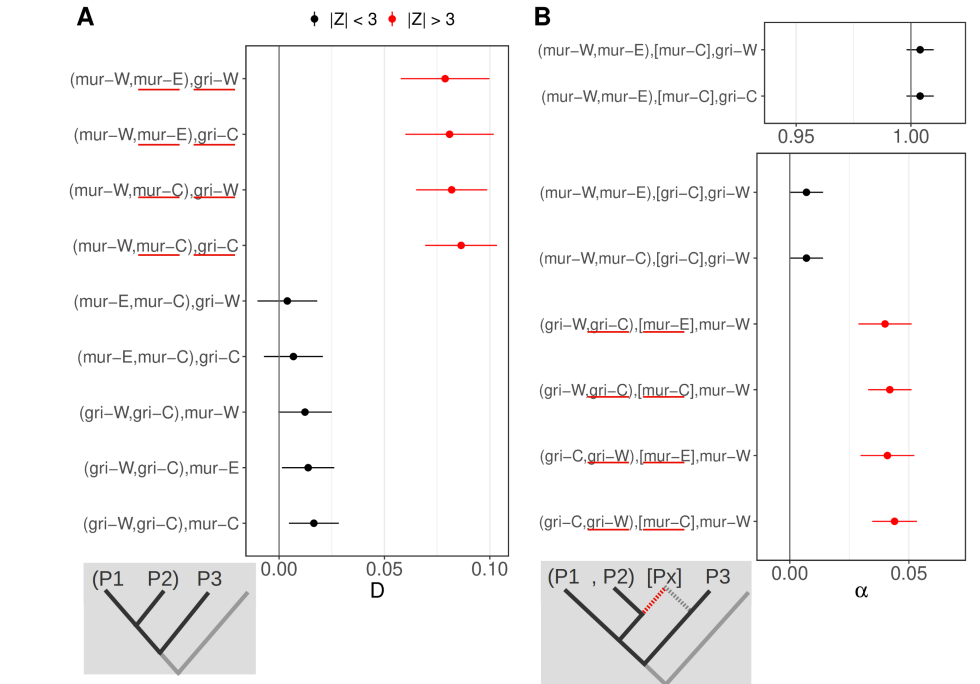

**Fig. S20: Admixture statistics suggest some ancestral but no contemporary gene flow.**  
**A) D-statistics.** Focal comparisons are listed as (P1, P2), P3 and test for admixture between P3 and P1 (negative D) or P2 (positive D). Populations inferred to have experienced admixture are underlined in red. For all tests, *M. rufus* was used as the outgroup (O/P4). In the top 4 rows, with *mur-W* as P1, D is significant and highly similar regardless of which *griseorufus* population (*gri-W* or *gri-C*) is used as P3 and regardless of which southeastern *murinus* population (*mur-E* or *mur-C*) is used as P2. This suggests historical but no ongoing admixture between the ancestral *griseorufus* and southeastern *murinus* lineages. A lack of ongoing gene flow is also supported by non-significant results for the bottom five comparisons.  
**B) f<sub>4</sub>-ratio tests.** Focal comparisons are listed as (P1, P2), [Px], P3, where Px is tested for being a mixture between P2 and P3. On the x-axis,  $\alpha$  indicates the proportion of P2 ancestry in Px ( $\alpha=1$  if Px is sister to P2 with no admixture from P3, and  $\alpha=0$  if Px is sister to P3 with no admixture from P2). Admixture is inferred if  $\alpha$  is significantly different from 0 and 1 (red dots). Consistent with results for D-statistics, admixture is inferred between the two southeastern *murinus* populations and both *griseorufus* populations, with values of  $\alpha$  highly similar regardless of which *griseorufus* population (*gri-W* or *gri-C*) is used as P1 and which as P2, and regardless of which southeastern *murinus* population (*mur-E* or *mur-C*) is used as Px.

## 5 References

- Bolger A.M., Lohse M., Usadel B. 2014. Trimmomatic: a flexible trimmer for Illumina sequence data. *Bioinformatics*. 30:2114–2120.
- Earl D.A., vonHoldt B.M. 2012. STRUCTURE HARVESTER: a website and program for visualizing STRUCTURE output and implementing the Evanno method. *Conservation Genet Resour*. 4:359–361.
- Evanno G., Regnaut S., Goudet J. 2005. Detecting the number of clusters of individuals using the software structure: a simulation study. *Molecular Ecology*. 14:2611–2620.
- Gilbert K.J., Andrew R.L., Bock D.G., Franklin M.T., Kane N.C., Moore J.-S., Moyers B.T., Renaut S., Rennison D.J., Veen T., Vines T.H. 2012. Recommendations for utilizing and reporting population genetic analyses: the reproducibility of genetic clustering using the program structure. *Molecular Ecology*. 21:4925–4930.
- Hapke A., Gligor M., Rakotondranary S.J., Rosenkranz D., Zupke O. 2011. Hybridization of mouse lemurs: different patterns under different ecological conditions. *BMC Evolutionary Biology*. 11:297.
- Li H. 2013. Aligning sequence reads, clone sequences and assembly contigs with BWA-MEM. *arXiv:1303.3997 [q-bio]*.
- Li H., Handsaker B., Wysoker A., Fennell T., Ruan J., Homer N., Marth G., Abecasis G., Durbin R., 1000 Genome Project Data Processing Subgroup. 2009. The Sequence Alignment/Map format and SAMtools. *Bioinformatics*. 25:2078–2079.
- Lüdemann J. 2018. Re-assessment of a lemur hybrid zone using mitochondrial and nuclear data. BSc thesis, Universität Hamburg.
- O’Leary S.J., Puritz J.B., Willis S.C., Hollenbeck C.M., Portnoy D.S. 2018. These aren’t the loci you’re looking for: Principles of effective SNP filtering for molecular ecologists. *Mol. Ecol*. 27:3193–3206.
- Pritchard J.K., Stephens M., Donnelly P. 2000. Inference of population structure using multilocus genotype data. *Genetics*. 155:945–959.
- Rochette N.C., Rivera-Colón A.G., Catchen J.M. 2019. Stacks 2: Analytical methods for paired-end sequencing improve RADseq-based population genomics. *Molecular Ecology*. 28:4737–4754.
